# Supplementary material
Source: publisher site journal article supplement (https://www.dovepress.com/article/294722)
Supplement: Supplementary file 1 [file get_supplementary_file.php]

**SUPPLEMENTAL MATERIALS**

**Cognitive tests details**

D2 Test involves the cancellation of specific designated letters vertical lines above and/or below the letters. The test has 14 rows of 47 characters in each row. Participants are allowed 20s for each row, to cancel the letter d with 2 vertical lines below and/or above the letter. The test assesses attention through the rate of cancellation, accuracy, consistency of the work, and the number of mistakes. Generated variables include total signs marked ( quantitative performance index marked “GZ”), total signs correctly marked (marked “BR”), total signs correctly marked minus incorrect marked items (concentration performance index also marked “KL”), total omission mistakes (marked “F1”), total commission mistakes (marked “F2”)23.

The Dubois’s 5 words test studies the recall of a short list, which the physician ensures the patient has registered. Its construction permits the identification of patients exhibiting objective memory disorders24. Ten points are given when the five words are correctly repeated for the delayed recall.

The clock drawing test is a simple tool used to screen visuospatial and executive functions. A total of 30 points is given when spatial organization and numbers drawing are well achieved 25.

The digit span trial is a common and simple measure of working memory. A maximum of 16 points can be given for digit span forwards (DSF) and 14 for digit span backwards (DSB) 26.
